# Supplementary material
Source: Springer Nature journal article supplement (https://www.springermedizin.de/resource/supplementary/12950_2011_291_MOESM1_ESM.pdf/9557478)

A

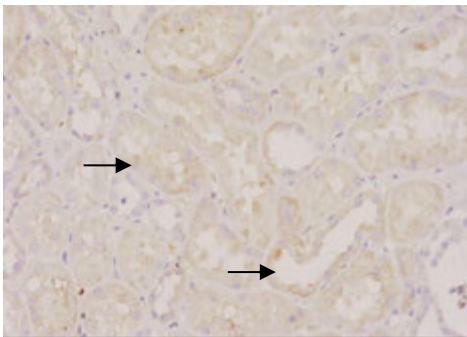

B

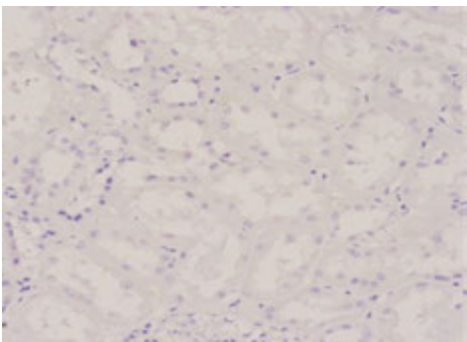

C

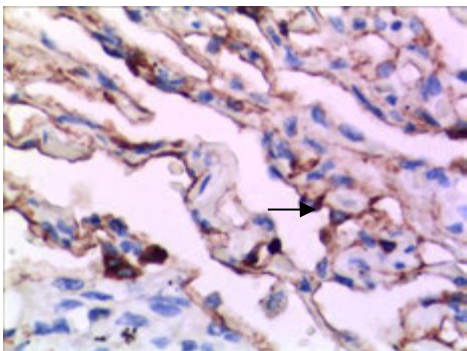

Supplement: MOESM1 [file 9557478]
